# Supplementary material
Source: publisher figshare collection journal article supplement (https://acs.figshare.com/ndownloader/files/4029031)
Supplement: Supplementary file 1 [file 4029031]

## Supporting Information

# Bio-Inspired Crystallization of Continuous Calcium Phosphate Films on Langmuir Monolayer of Zein Protein: Their Mechanical Performance, Hydrophilicity and Biocompatibility

Cai-Yun Zhang,<sup>†,‡</sup> Wei Zhang,<sup>‡</sup> Hong-Bin Yao,<sup>†</sup> Hai-Zhou Zhu,<sup>†</sup> Li-Bo Mao,<sup>†</sup> Shu-Hong Yu<sup>\*,†</sup>

<sup>†</sup>*Division of Nanomaterials & Chemistry, Hefei National Laboratory for Physical Sciences at Microscale, Department of Chemistry, CAS Key Laboratory of Mechanical Behavior and Design of Materials, the National Synchrotron Radiation Laboratory, University of Science and Technology of China, Hefei 230026, P. R. China.* <sup>‡</sup>*School of Pharmacy, Anhui University of Traditional Chinese Medicine, Anhui Academy of Traditional Chinese Medicine, Hefei 230038, P. R. China*

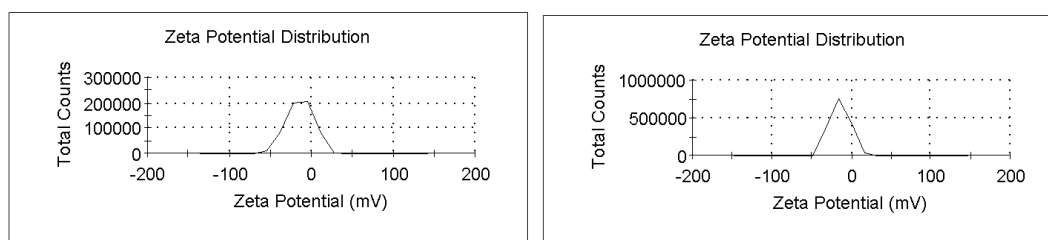

**Figure S1.** Zeta potential of the Zein solution with different concentration: (a) 2 mg/mL and (b) 1 mg/mL.

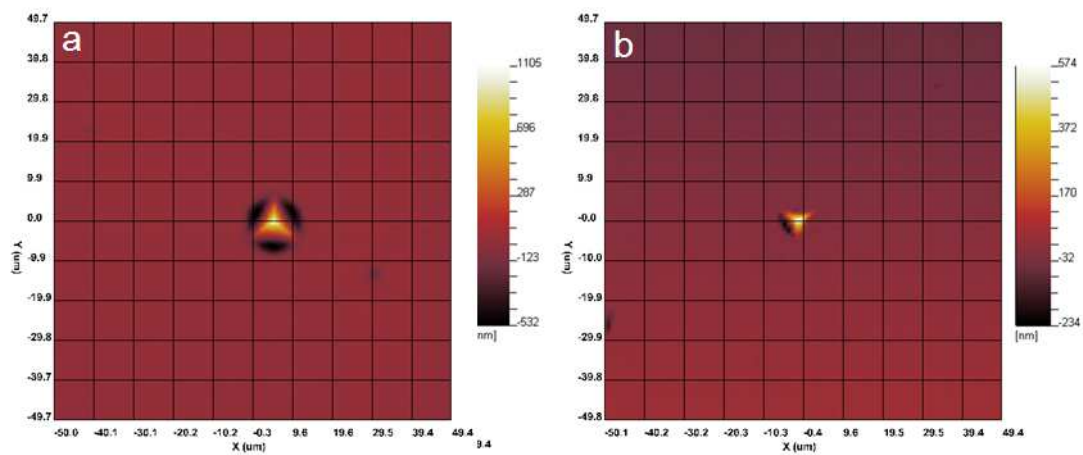

**Figure S2.** 3D images of the indents for (a) Zein film and (b) mineralized nanocomposite Zein film under the same load of 8 mN.

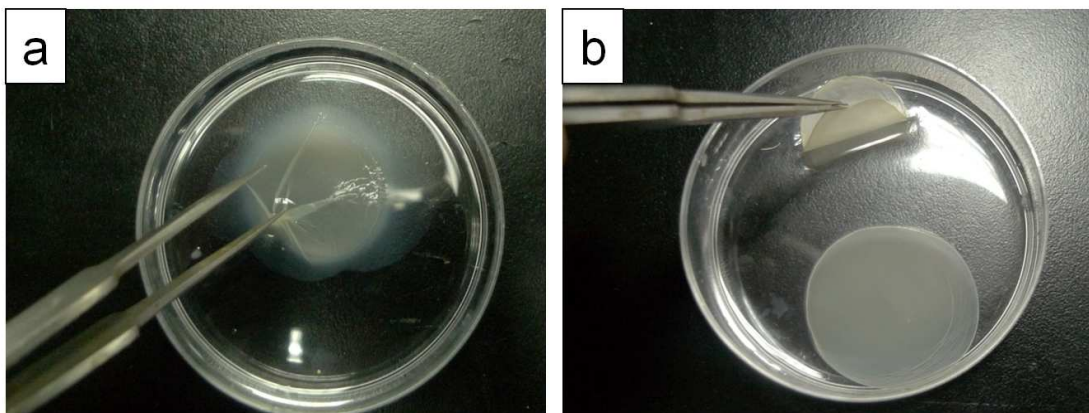

**Figure S3.** Photographs of visible Zein membrane obtained by carefully spreading 30 mg/mL Zein solution on the air-water surface of (a) pure water and (b) 10 SBF for 0.5 h.
